# Supplementary material for: Iron pentacarbonyl ligands on silver scorpionates
Source: Royal Society of Chemistry journal article supplement (doi:10.1039/d1cc06859h), 2022-01-01
Supplement: d1cc06859h1.pdf [file d1cc06859h1.pdf]

# Iron pentacarbonyl ligands on silver scorpionates

Guocang Wang,<sup>[1]</sup> Anurag Noonikara-Poyil,<sup>[1]</sup> Israel Fernández,<sup>[2],\*</sup>

H. V. Rasika Dias<sup>[1],\*</sup>

## Affiliations:

[1] Department of Chemistry and Biochemistry, The University of Texas at Arlington, Arlington, Texas 76019, USA, E-mail: [dias@uta.edu](mailto:dias@uta.edu).

[2] Departamento de Química Orgánica I and Centro de Innovación en Química Avanzada (ORFEO-CINQA), Facultad de Ciencias Químicas, Universidad Complutense de Madrid, 28040-Madrid, Spain, E-mail: [israel@quim.ucm.es](mailto:israel@quim.ucm.es)

## Supplementary Materials

## Abbreviations and molecules

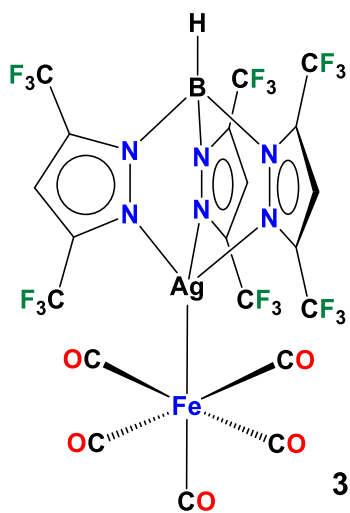

[HB(3,5-(CF<sub>3</sub>)<sub>2</sub>Pz)<sub>3</sub>]Ag-Fe(CO)<sub>5</sub> (3)

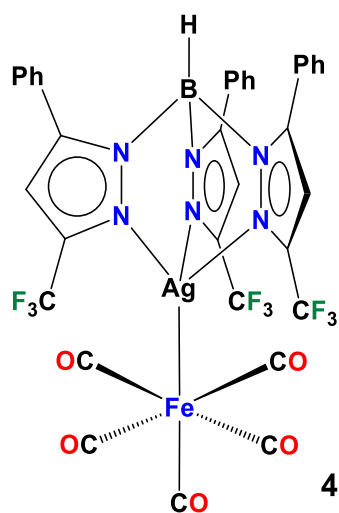

[HB(3-(CF<sub>3</sub>),5-(Ph)Pz)<sub>3</sub>]Ag-Fe(CO)<sub>5</sub> (4)

## General Information

All manipulations were carried out under an atmosphere of purified nitrogen using standard Schlenk techniques or in a MBRAUN LABMaster glovebox equipped with a -10 °C refrigerator. Solvents were purchased from commercial sources, and purified by conventional methods prior to use. Glassware was oven-dried at 150 °C overnight. The NMR spectra were recorded at the room temperature on a JEOL Eclipse 500 spectrometer ( $^1\text{H}$ : 500.16 MHz,  $^{13}\text{C}$ : 125.77 MHz and 470.62 MHz) and a JEOL Eclipse 300 spectrometer ( $^{19}\text{F}$ : 282.78 MHz). Chemical shifts for  $^1\text{H}$  and  $^{13}\text{C}$  spectra are referenced to the solvent peak ( $^1\text{H}$ ;  $\text{CD}_2\text{Cl}_2$   $\delta$  5.32,  $\text{CDCl}_3$ ,  $\delta$  7.26  $^{13}\text{C}$ ;  $\text{CD}_2\text{Cl}_2$   $\delta$  53.84,  $\text{CDCl}_3$   $\delta$  77.16,  $\text{DMSO-}d_6$   $\delta$  39.52).  $^1\text{H}$  NMR coupling constants (J) are reported in Hertz (Hz) and multiplicities are indicated as follows: s (singlet), d (doublet), t (triplet), m (multiplet).  $^{19}\text{F}$  NMR values were referenced to external  $\text{CFCl}_3$ . IR spectra were collected at room temperature on a Shimadzu IRPrestige-21 FTIR containing an ATR attachment at  $2\text{ cm}^{-1}$  resolution. Elemental analyses were performed at Intertek USA, Whitehouse, NJ. Deuterated solvents were purchased from Acros Organics and Cambridge Isotope Laboratories, respectively. The  $\text{Fe}(\text{CO})_5$  was obtained from Sigma-Aldrich Company and distilled prior to use. Deuterated solvents were purchased from Acros Organics and Cambridge Isotope Laboratories, respectively. Heating was accomplished by either a heating mantle or a silicone oil bath.  $[\text{HB}(3,5\text{-(CF}_3)_2\text{Pz})_3]\text{Ag}(\text{CO})^1$  and  $[\text{HB}(3\text{-(CF}_3)_2,5\text{-(Ph)Pz})_3]\text{Na}(\text{THF})^2$  were prepared according to literature procedures.

## Synthesis and Characterization of Metal complexes

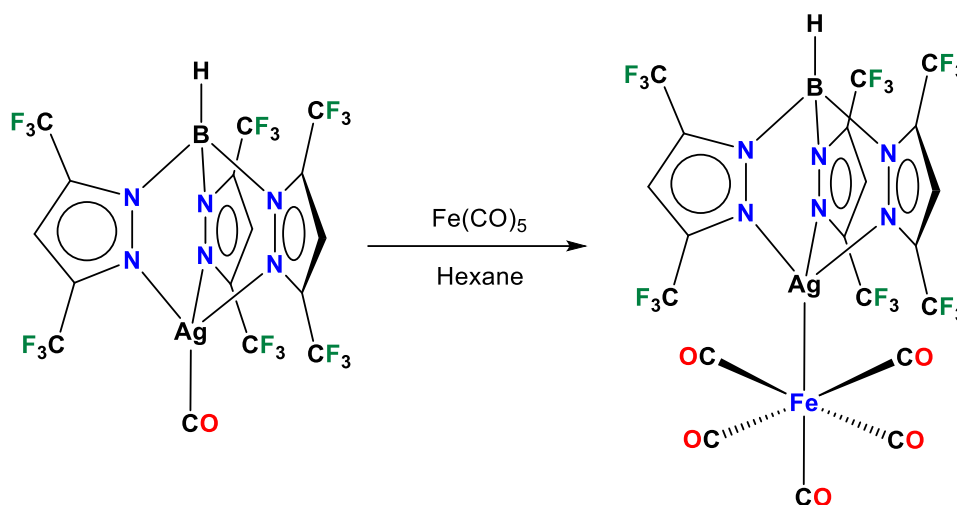

### Synthesis of [HB(3,5-(CF<sub>3</sub>)<sub>2</sub>Pz)<sub>3</sub>]Ag-Fe(CO)<sub>5</sub> (3)

To a colorless solution of [HB(3,5-(CF<sub>3</sub>)<sub>2</sub>Pz)<sub>3</sub>]Ag(CO) (185 mg, 0.25 mmol) in anhydrous hexane (5 mL) at -20 °C was added dropwise a yellow solution of Fe(CO)<sub>5</sub> (98 mg, 0.5 mmol) in anhydrous hexane (0.5 mL) under N<sub>2</sub> atmosphere. The colorless solution was stirred for 10 min. The solution was kept in refrigerator under -20 °C overnight to obtain [HB(3,5-(CF<sub>3</sub>)<sub>2</sub>Pz)<sub>3</sub>]Ag-Fe(CO)<sub>5</sub> as yellow single crystals (169 mg, 73 % yield). <sup>1</sup>H NMR (CD<sub>2</sub>Cl<sub>2</sub>, 500.16 MHz, 298 K) δ: 6.98 (s, Pz), 4.97 (br, 1H, BH). <sup>13</sup>C{<sup>1</sup>H} NMR (CD<sub>2</sub>Cl<sub>2</sub>, 125.77 MHz, 298 K) δ: 207.3 (br s, CO), 143.9 (q, J<sub>C-F</sub> = 39.0 Hz, CCF<sub>3</sub>), 140.8 (q, J<sub>C-F</sub> = 40.5 Hz, CCF<sub>3</sub>), 120.9 (q, <sup>1</sup>J<sub>CF</sub> = 268.8 Hz, CF<sub>3</sub>), 119.7 (q, <sup>1</sup>J<sub>CF</sub> = 270 Hz, CF<sub>3</sub>), 107.0 (s, CH-Pz). <sup>19</sup>F NMR (CD<sub>2</sub>Cl<sub>2</sub>, 470.62 MHz, 298 K) δ: -59.5 (s, CF<sub>3</sub>), -61.7 (s, br, CF<sub>3</sub>). IR (Selected bands) cm<sup>-1</sup>: 2009 (CO), 2038 (CO), 2068 (CO), 2130 (CO). Anal. Calcd. for C<sub>20</sub>H<sub>4</sub>AgBF<sub>18</sub>FeN<sub>6</sub>O<sub>5</sub>: C, 25.98; H, 0.44; N, 9.09. Found: C, 25.91; H, 0.36; N, 9.95.

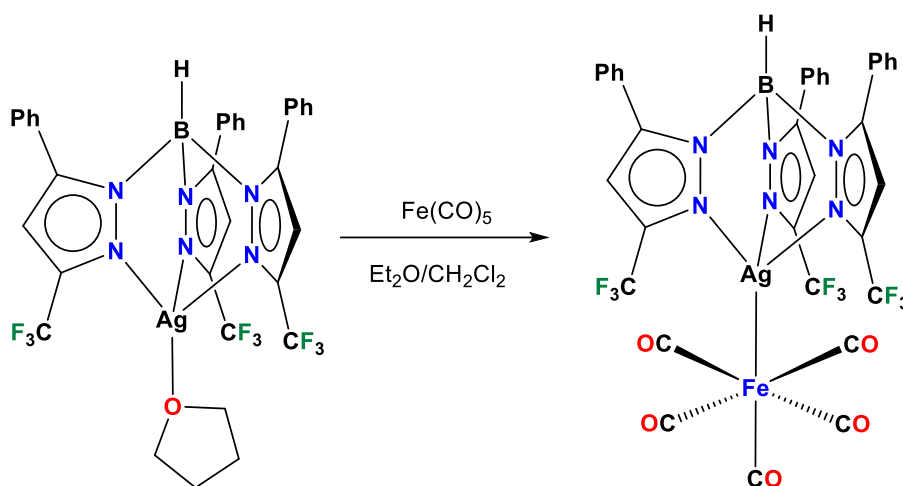

### Synthesis of $[\text{HB}(3\text{-(CF}_3\text{)},5\text{-(Ph)Pz})_3\text{Ag-Fe(CO)}_5$ (4)

$[\text{HB}(3\text{-(CF}_3\text{)},5\text{-(Ph)Pz})_3\text{Ag}(\text{THF})$  (165 mg, 0.2 mmol) (prepared by the reaction of  $[\text{HB}(3\text{-(CF}_3\text{)},5\text{-(Ph)Pz})_3\text{Na}(\text{THF})$  with  $\text{AgOTf}^2$ ) was dissolved in anhydrous  $\text{Et}_2\text{O}/\text{CH}_2\text{Cl}_2$  (1:1, 10 mL) and the solvent was removed in order to remove the coordinated THF. The residue was dissolved in anhydrous  $\text{CH}_2\text{Cl}_2$  (5 mL) at  $-20\text{ }^\circ\text{C}$  a yellow solution of  $\text{Fe(CO)}_5$  (78.5 mg, 0.4 mmol) in anhydrous  $\text{CH}_2\text{Cl}_2$  (0.5 mL) was added under  $\text{N}_2$  atmosphere. The yellow solution was stirred for 10 min. The solution was mixed with some hexane and kept in refrigerator under  $-20\text{ }^\circ\text{C}$  overnight to obtain  $[\text{HB}(3\text{-(CF}_3\text{)},5\text{-(Ph)Pz})_3\text{Ag-Fe(CO)}_5$  as yellow single crystals (90 mg, 47% yield).  $^1\text{H}$  NMR ( $\text{CD}_2\text{Cl}_2$ , 500.16 MHz, 298 K)  $\delta$ : 7.24-7.20 (m, 3H, Ph), 6.97-6.95 (m, 6H, Ph), 6.59 (s, 3H, Pz), 4.71 (br, 1H, BH).  $^{13}\text{C}\{^1\text{H}\}$  NMR ( $\text{CD}_2\text{Cl}_2$ , 125.77 MHz, 298 K)  $\delta$ : 208.5 (br s,  $\underline{\text{CO}}$ ), 152.2, 143.0 (q,  $J_{\text{C-F}} = 37.2\text{ Hz}$ ,  $\text{CCF}_3$ ), 131.4, 130.0, 128.4, 128.1, 122.0 (q,  $^1J_{\text{CF}} = 267.5\text{ Hz}$ ,  $\text{CF}_3$ ), 105.1 (s, CH-Pz).  $^{19}\text{F}$  NMR ( $\text{CD}_2\text{Cl}_2$ , 282.78 MHz, 298 K)  $\delta$ : -61.3 (s,  $\text{CF}_3$ ). IR (Selected bands)  $\text{cm}^{-1}$ : 1996 (CO), 2032 (CO), 2043 (CO), 2058 (CO), 2123 (CO). Anal. Calcd. for  $\text{C}_{35}\text{H}_{19}\text{AgFeBF}_9\text{N}_6\text{O}_5$  with 0.75 hexane: C, 46.80; H, 2.93; N, 8.29. Found: 46.75; H, 2.83; N, 8.21.

## $^1\text{H}$ , $^{13}\text{C}$ , $^{19}\text{F}$ NMR, and IR Spectra of Metal Complexes

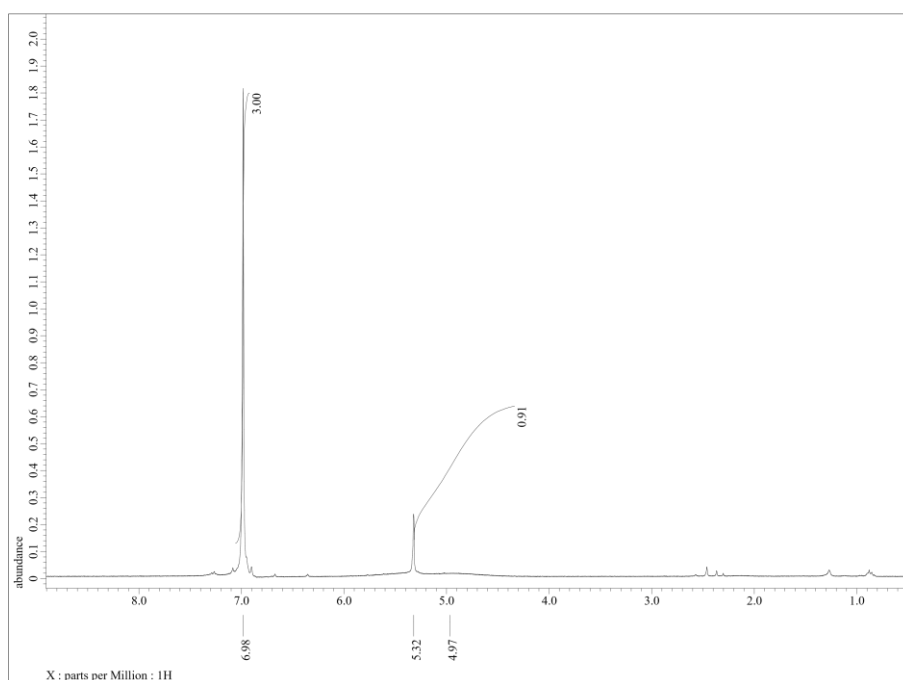

**Figure S1:**  $^1\text{H}$  NMR Spectrum of  $[\text{HB}(\text{3,5-(CF}_3)_2\text{Pz})_3]\text{Ag-Fe}(\text{CO})_5$  (3) in  $\text{CD}_2\text{Cl}_2$ .

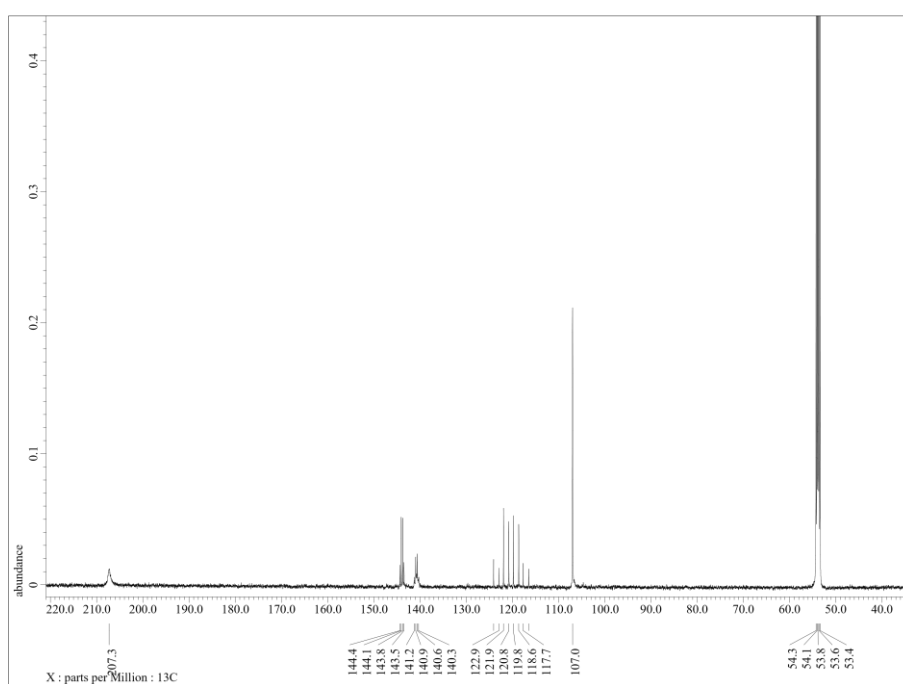

**Figure S2:**  $^{13}\text{C}$  NMR Spectrum of  $[\text{HB}(\text{3,5-(CF}_3)_2\text{Pz})_3]\text{Ag-Fe}(\text{CO})_5$  (3) in  $\text{CD}_2\text{Cl}_2$ .

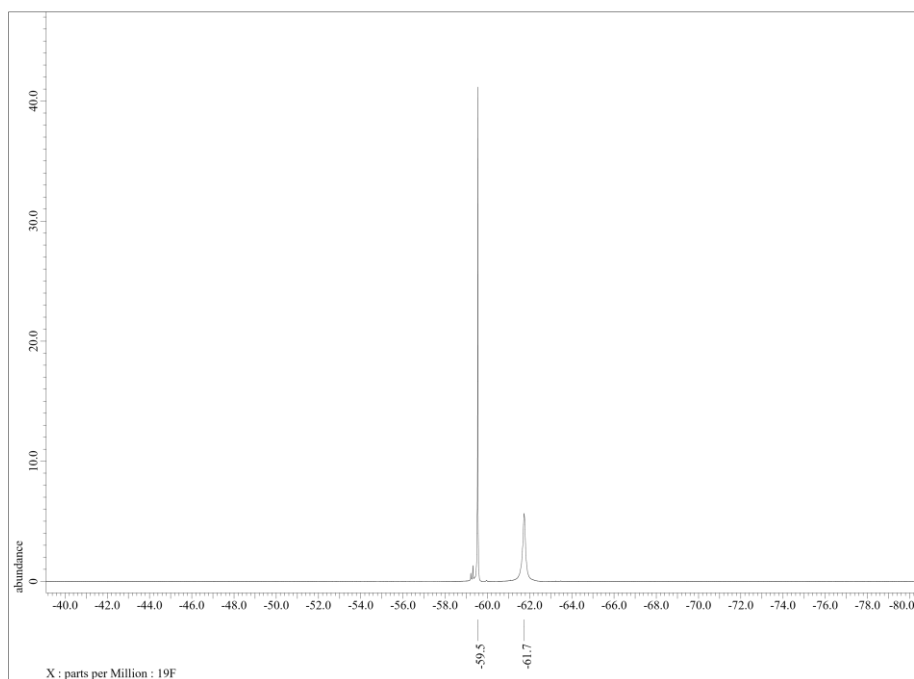

**Figure S3:**  $^{19}\text{F}$  NMR Spectrum of  $[\text{HB}(\text{3,5-(CF}_3)_2\text{Pz})_3]\text{Ag-Fe(CO)}_5$  (**3**) in  $\text{CD}_2\text{Cl}_2$ .

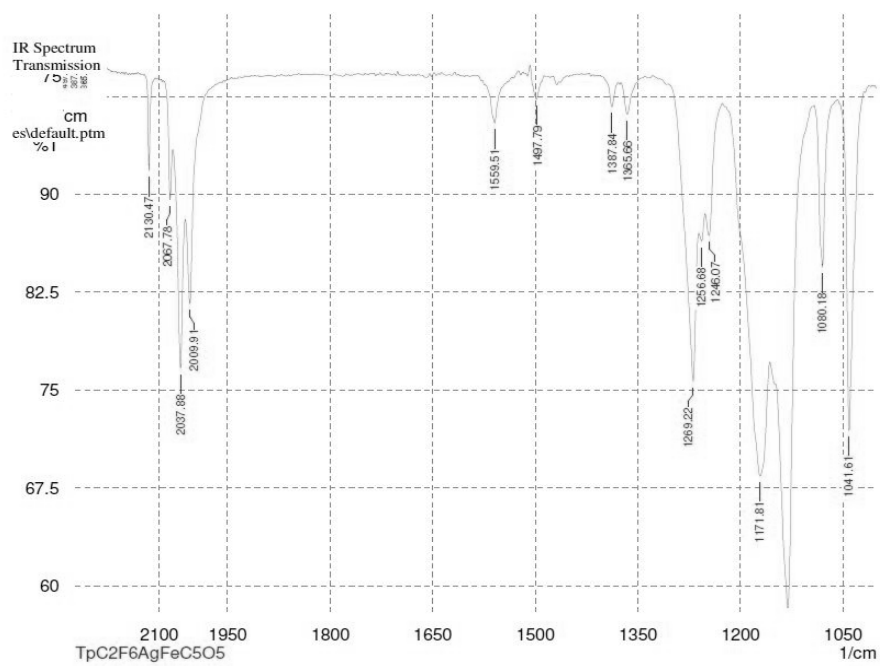

**Figure S4:** IR Spectrum of  $[\text{HB}(\text{3,5-(CF}_3)_2\text{Pz})_3]\text{Ag-Fe(CO)}_5$  (**3**).

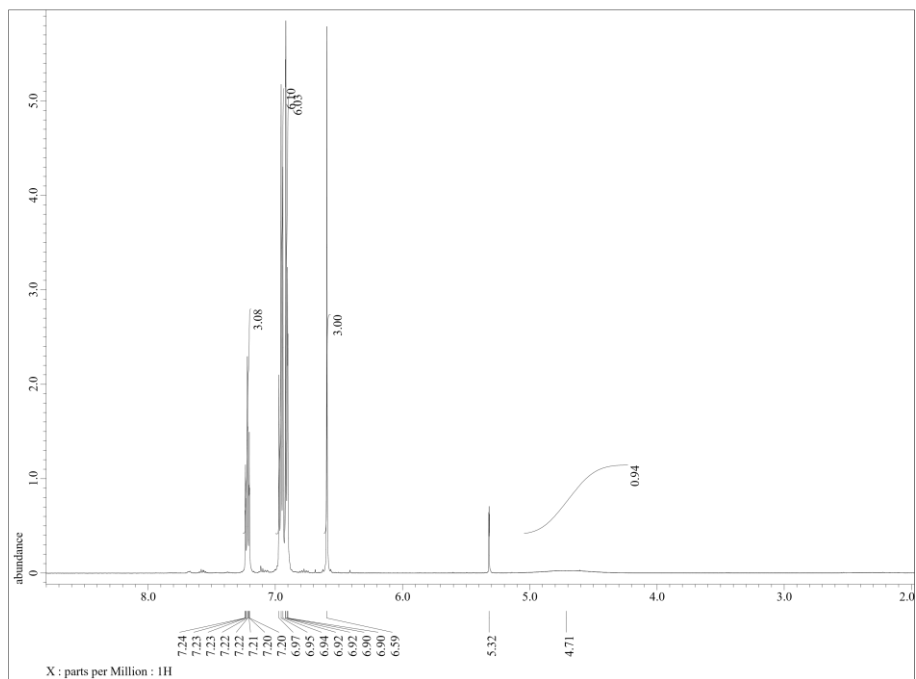

**Figure S5:**  $^1\text{H}$  NMR Spectrum of  $[\text{HB}(\text{3-(CF}_3\text{),5-(Ph)Pz})_3\text{Ag-Fe(CO)}_5$  (**4**) in  $\text{CD}_2\text{Cl}_2$ .

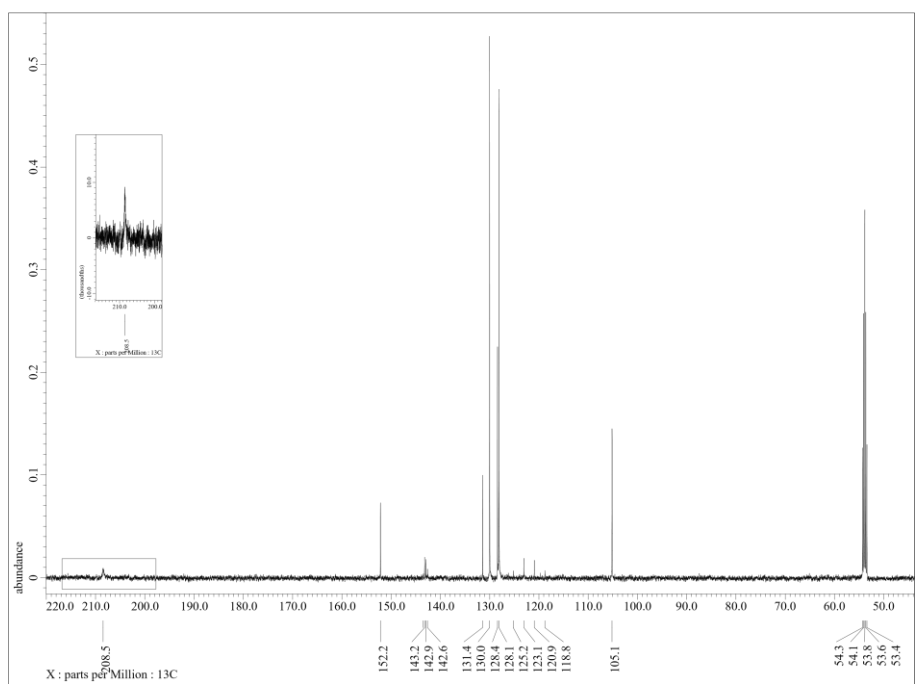

**Figure S6:**  $^{13}\text{C}$  NMR Spectrum of  $[\text{HB}(\text{3-(CF}_3\text{),5-(Ph)Pz})_3\text{Ag-Fe(CO)}_5$  (**4**) in  $\text{CD}_2\text{Cl}_2$ .



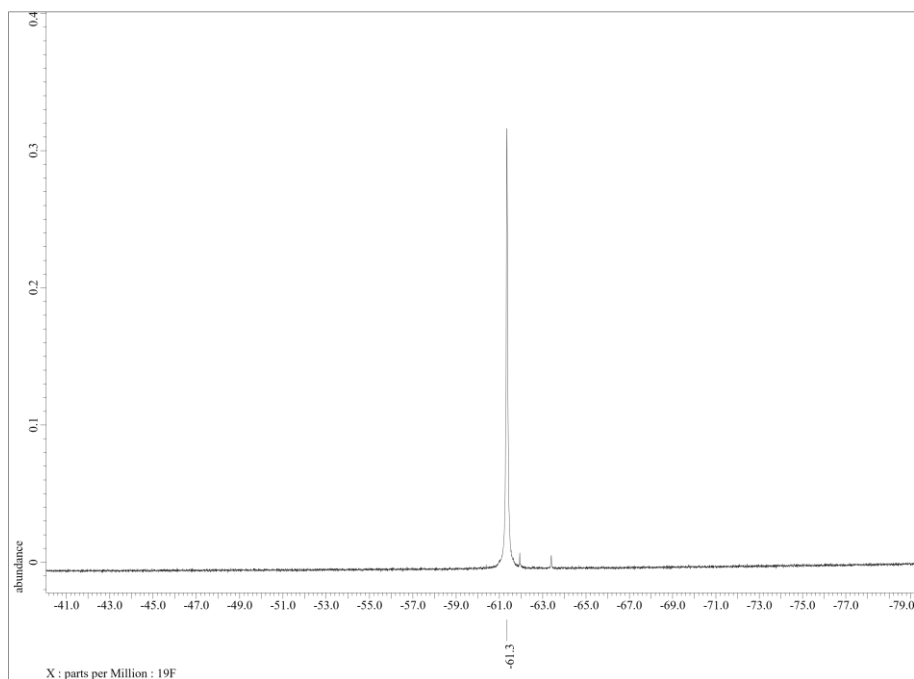

**Figure S7:**  $^{19}\text{F}$  NMR Spectrum of  $[\text{HB}(3\text{-(CF}_3\text{)},5\text{-(Ph)Pz})_3]\text{Ag-Fe(CO)}_5$  (**4**) in  $\text{CD}_2\text{Cl}_2$ .

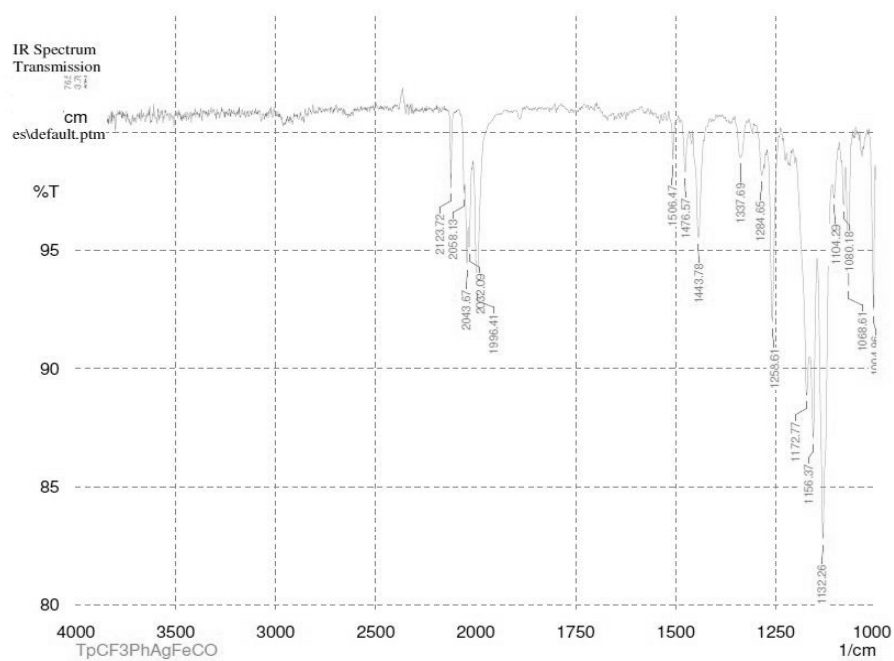

**Figure S8:** IR Spectrum of  $[\text{HB}(3\text{-(CF}_3\text{)},5\text{-(Ph)Pz})_3]\text{Ag-Fe(CO)}_5$  (**4**).

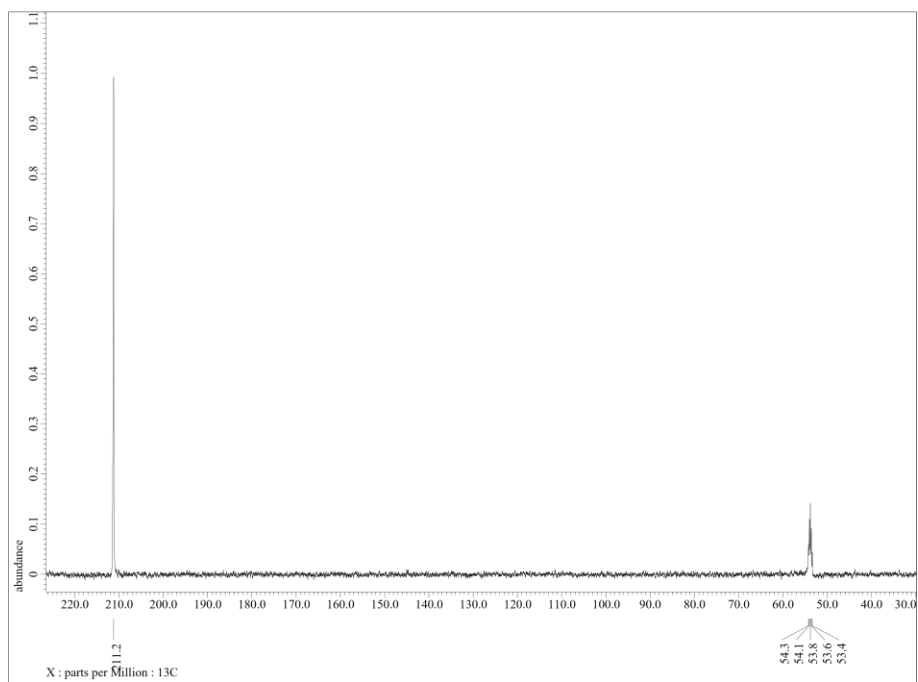

**Figure S9:**  $^{13}\text{C}$  NMR Spectrum of  $\text{Fe}(\text{CO})_5$  in  $\text{CD}_2\text{Cl}_2$ .

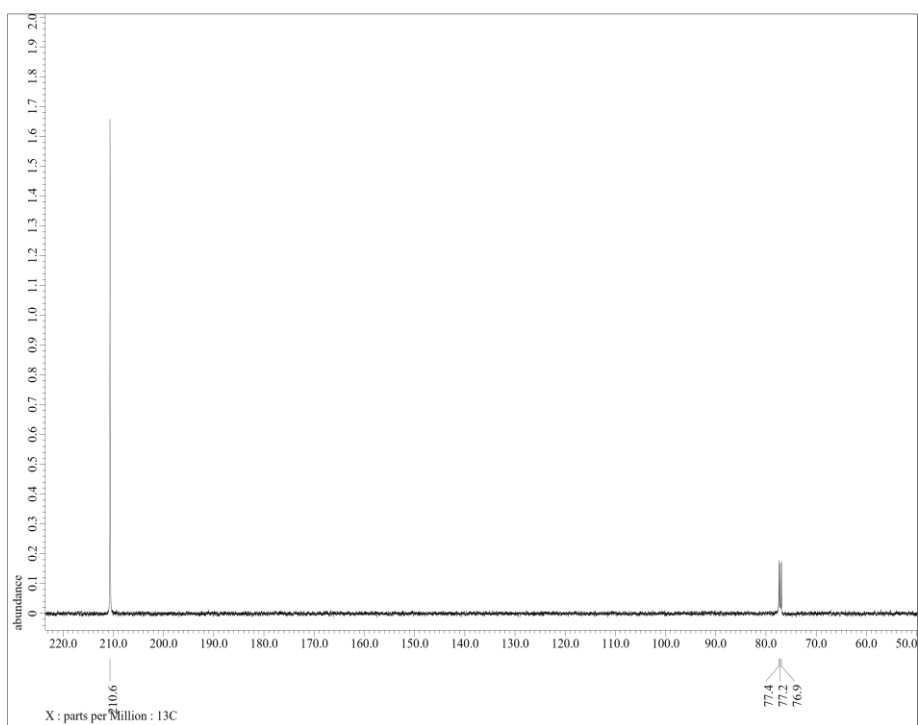

**Figure S10:**  $^{13}\text{C}$  NMR Spectrum of  $\text{Fe}(\text{CO})_5$  in  $\text{CDCl}_3$ .

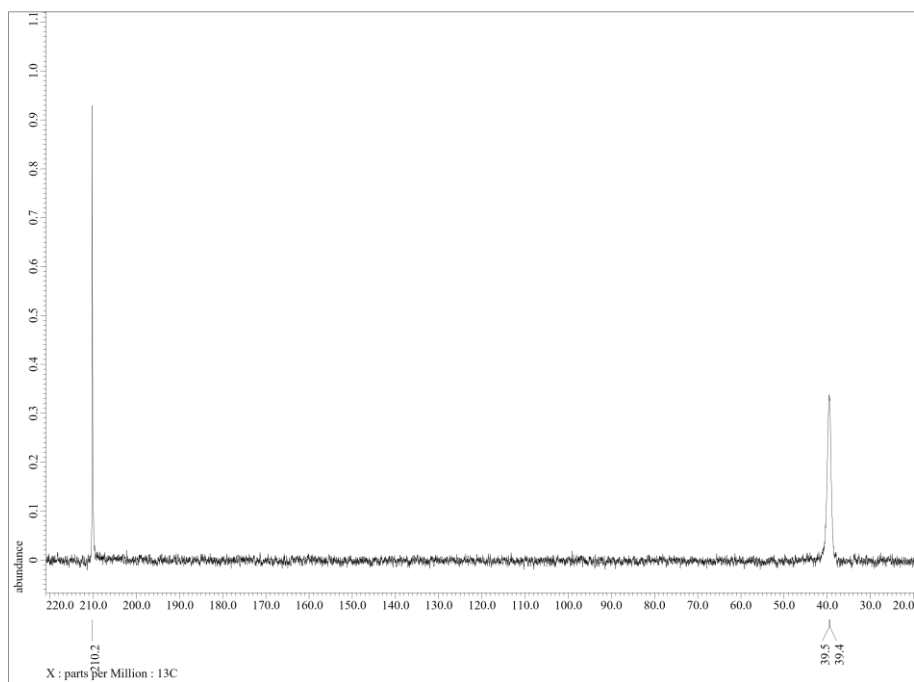

**Figure S11:**  $^{13}\text{C}$  NMR Spectrum of  $\text{Fe}(\text{CO})_5$  in  $\text{DMSO-}d_6$ .

### **X-ray Data Collection and Structure Determinations**

A suitable crystal covered with a layer of hydrocarbon/Paratone-N oil was selected and mounted on a Cryo-loop, and immediately placed in the low temperature nitrogen stream. The X-ray intensity data were measured at 100(2) K (unless otherwise noted) on a Bruker D8 Quest with a Photon 100 CMOS detector equipped with an Oxford Cryosystems 700 series cooler, a Triumph monochromator, and a Mo K $\alpha$  fine-focus sealed tube ( $\lambda = 0.71073$  Å). Intensity data were processed using the Bruker Apex program suite. Absorption corrections were applied by using SADABS.<sup>3</sup> Initial atomic positions were located by SHELXT,<sup>4</sup> and the structures of the compounds were refined by the least-squares method using SHELXL<sup>5</sup> within Olex2 GUI.<sup>6</sup> All the non-hydrogen atoms were refined anisotropically. The H atoms were included in their calculated positions and refined as riding on the atoms to which they are joined. X-ray structural figures were generated using Olex2.<sup>6</sup> The CCDC 2126148 contain the supplementary crystallographic data for these molecules.

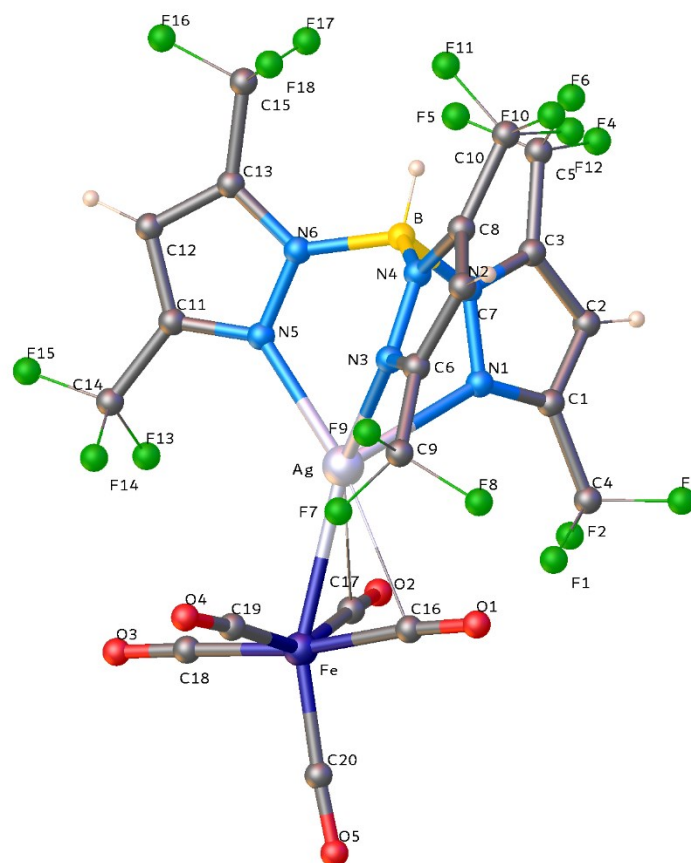

**Figure S12.** Atom labelling scheme of  $[\text{HB}(3,5\text{-(CF}_3)_2\text{Pz)}_3]\text{Ag-Fe(CO)}_5$  (**3**)

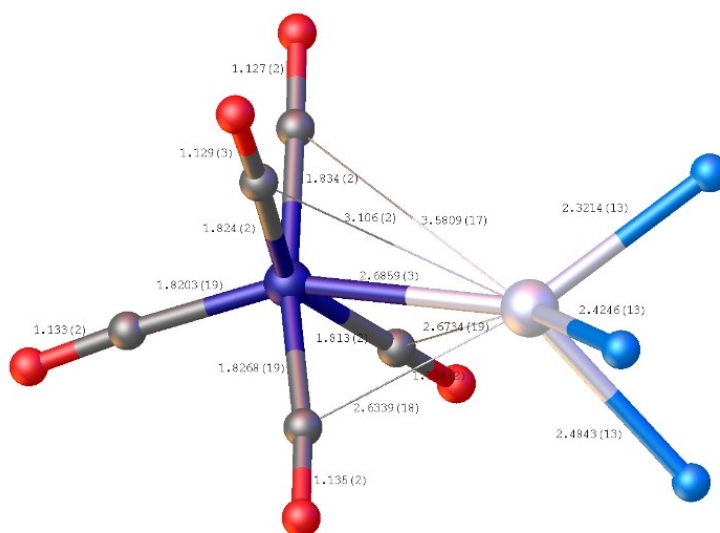

**Figure S13.** A view showing the coordination geometry at silver and iron in  $[\text{HB}(3,5\text{-(CF}_3)_2\text{Pz)}_3]\text{Ag-Fe(CO)}_5$  (**3**), and selected bond distances

**Table S1.** Crystal data and structure refinement for [HB(3,5-(CF<sub>3</sub>)<sub>2</sub>Pz)<sub>3</sub>]Ag-Fe(CO)<sub>5</sub> (**3**).

|                                             |                                                                                   |
|---------------------------------------------|-----------------------------------------------------------------------------------|
| Identification code                         | rad526a_a                                                                         |
| Empirical formula                           | C <sub>20</sub> H <sub>4</sub> AgBF <sub>18</sub> FeN <sub>6</sub> O <sub>5</sub> |
| Formula weight                              | 924.80                                                                            |
| Temperature/K                               | 100.0                                                                             |
| Crystal system                              | monoclinic                                                                        |
| Space group                                 | P2 <sub>1</sub> /c                                                                |
| a/Å                                         | 11.4955(4)                                                                        |
| b/Å                                         | 25.9298(8)                                                                        |
| c/Å                                         | 10.7081(3)                                                                        |
| α/°                                         | 90                                                                                |
| β/°                                         | 113.251(1)                                                                        |
| γ/°                                         | 90                                                                                |
| Volume/Å <sup>3</sup>                       | 2932.60(16)                                                                       |
| Z                                           | 4                                                                                 |
| ρ <sub>calc</sub> /cm <sup>3</sup>          | 2.0944                                                                            |
| μ/mm <sup>-1</sup>                          | 1.322                                                                             |
| F(000)                                      | 1783.6                                                                            |
| Crystal size/mm <sup>3</sup>                | 0.4 × 0.3 × 0.15                                                                  |
| Radiation                                   | Mo Kα (λ = 0.71073)                                                               |
| 2θ range for data collection/°              | 6.1 to 61.06                                                                      |
| Index ranges                                | -16 ≤ h ≤ 16, -36 ≤ k ≤ 37, -15 ≤ l ≤ 15                                          |
| Reflections collected                       | 40436                                                                             |
| Independent reflections                     | 8966 [R <sub>int</sub> = 0.0193, R <sub>sigma</sub> = 0.0151]                     |
| Data/restraints/parameters                  | 8966/0/469                                                                        |
| Goodness-of-fit on F <sup>2</sup>           | 1.060                                                                             |
| Final R indexes [I ≥ 2σ (I)]                | R <sub>1</sub> = 0.0277, wR <sub>2</sub> = 0.0680                                 |
| Final R indexes [all data]                  | R <sub>1</sub> = 0.0297, wR <sub>2</sub> = 0.0692                                 |
| Largest diff. peak/hole / e Å <sup>-3</sup> | 0.92/-0.95                                                                        |

**Table S2.** Bond Lengths for [HB(3,5-(CF<sub>3</sub>)<sub>2</sub>Pz)<sub>3</sub>]Ag-Fe(CO)<sub>5</sub> (**3**).

| Atom | Atom | Length/Å   | Atom | Atom | Length/Å   |
|------|------|------------|------|------|------------|
| Ag   | Fe   | 2.6859(3)  | O1   | C16  | 1.135(2)   |
| Ag   | N1   | 2.4843(13) | O2   | C17  | 1.138(2)   |
| Ag   | N3   | 2.4246(13) | O3   | C18  | 1.127(2)   |
| Ag   | N5   | 2.3214(13) | O4   | C19  | 1.129(3)   |
| Ag   | C16  | 2.6339(18) | O5   | C20  | 1.133(2)   |
| Ag   | C17  | 2.6734(19) | N1   | N2   | 1.3556(17) |
| Fe   | C16  | 1.8268(19) | N1   | C1   | 1.3325(19) |

**Table S2.** Bond Lengths for [HB(3,5-(CF<sub>3</sub>)<sub>2</sub>Pz)<sub>3</sub>]Ag-Fe(CO)<sub>5</sub> (**3**)..

| Atom | Atom | Length/Å   | Atom | Atom | Length/Å   |
|------|------|------------|------|------|------------|
| Fe   | C17  | 1.813(2)   | N2   | C3   | 1.362(2)   |
| Fe   | C18  | 1.834(2)   | N2   | B    | 1.554(2)   |
| Fe   | C19  | 1.824(2)   | N3   | N4   | 1.3542(18) |
| Fe   | C20  | 1.8203(19) | N3   | C6   | 1.3344(19) |
| F1   | C4   | 1.335(2)   | N4   | C8   | 1.3596(19) |
| F2   | C4   | 1.3367(18) | N4   | B    | 1.563(2)   |
| F3   | C4   | 1.3421(19) | N5   | N6   | 1.3563(18) |
| F4   | C5   | 1.335(2)   | N5   | C11  | 1.333(2)   |
| F5   | C5   | 1.332(3)   | N6   | C13  | 1.357(2)   |
| F6   | C5   | 1.326(3)   | N6   | B    | 1.548(2)   |
| F7   | C9   | 1.330(2)   | C1   | C2   | 1.389(2)   |
| F8   | C9   | 1.341(2)   | C1   | C4   | 1.490(2)   |
| F9   | C9   | 1.336(2)   | C2   | C3   | 1.374(2)   |
| F10  | C10  | 1.340(2)   | C3   | C5   | 1.492(3)   |
| F11  | C10  | 1.323(3)   | C6   | C7   | 1.396(2)   |
| F12  | C10  | 1.338(2)   | C6   | C9   | 1.487(2)   |
| F13  | C14  | 1.333(3)   | C7   | C8   | 1.372(2)   |
| F14  | C14  | 1.331(2)   | C8   | C10  | 1.493(2)   |
| F15  | C14  | 1.329(2)   | C11  | C12  | 1.390(2)   |
| F16  | C15  | 1.336(2)   | C11  | C14  | 1.489(3)   |
| F17  | C15  | 1.329(3)   | C12  | C13  | 1.375(3)   |
| F18  | C15  | 1.340(2)   | C13  | C15  | 1.493(2)   |

**Table S3.** Bond Angles for [HB(3,5-(CF<sub>3</sub>)<sub>2</sub>Pz)<sub>3</sub>]Ag-Fe(CO)<sub>5</sub> (**3**)..

| Atom | Atom | Atom | Angle/°   | Atom | Atom | Atom | Angle/°    |
|------|------|------|-----------|------|------|------|------------|
| N1   | Ag   | Fe   | 128.16(3) | C1   | C4   | F2   | 112.72(14) |
| N3   | Ag   | Fe   | 135.10(3) | C1   | C4   | F3   | 110.42(14) |
| N3   | Ag   | N1   | 77.51(4)  | F5   | C5   | F4   | 107.3(2)   |
| N5   | Ag   | Fe   | 130.28(3) | F6   | C5   | F4   | 106.73(18) |
| N5   | Ag   | N1   | 83.29(5)  | F6   | C5   | F5   | 107.36(19) |
| N5   | Ag   | N3   | 82.89(5)  | C3   | C5   | F4   | 109.50(16) |
| C16  | Ag   | Fe   | 40.15(4)  | C3   | C5   | F5   | 112.22(17) |
| C16  | Ag   | N1   | 105.09(5) | C3   | C5   | F6   | 113.43(19) |
| C16  | Ag   | N3   | 103.78(5) | C7   | C6   | N3   | 112.18(14) |
| C16  | Ag   | N5   | 170.14(5) | C9   | C6   | N3   | 122.22(14) |
| C17  | Ag   | Fe   | 39.54(4)  | C9   | C6   | C7   | 125.58(14) |
| C17  | Ag   | N1   | 94.31(5)  | C8   | C7   | C6   | 103.19(14) |

**Table S3.** Bond Angles for [HB(3,5-(CF<sub>3</sub>)<sub>2</sub>Pz)<sub>3</sub>]Ag-Fe(CO)<sub>5</sub> (**3**).

| Atom | Atom | Atom | Angle/°    | Atom | Atom | Atom | Angle/°    |
|------|------|------|------------|------|------|------|------------|
| C17  | Ag   | N3   | 159.42(5)  | C7   | C8   | N4   | 109.42(14) |
| C17  | Ag   | N5   | 115.23(5)  | C10  | C8   | N4   | 124.42(15) |
| C17  | Ag   | C16  | 59.72(6)   | C10  | C8   | C7   | 126.08(15) |
| C16  | Fe   | Ag   | 68.39(6)   | F8   | C9   | F7   | 106.51(15) |
| C17  | Fe   | Ag   | 69.86(6)   | F9   | C9   | F7   | 107.13(15) |
| C17  | Fe   | C16  | 93.12(8)   | F9   | C9   | F8   | 106.28(15) |
| C18  | Fe   | Ag   | 103.17(6)  | C6   | C9   | F7   | 113.33(14) |
| C18  | Fe   | C16  | 170.88(8)  | C6   | C9   | F8   | 111.80(15) |
| C18  | Fe   | C17  | 86.88(9)   | C6   | C9   | F9   | 111.36(14) |
| C19  | Fe   | Ag   | 84.77(7)   | F11  | C10  | F10  | 107.61(17) |
| C19  | Fe   | C16  | 90.51(9)   | F12  | C10  | F10  | 106.39(18) |
| C19  | Fe   | C17  | 150.84(10) | F12  | C10  | F11  | 106.94(17) |
| C19  | Fe   | C18  | 85.13(10)  | C8   | C10  | F10  | 109.54(16) |
| C20  | Fe   | Ag   | 158.78(6)  | C8   | C10  | F11  | 114.27(17) |
| C20  | Fe   | C16  | 92.51(9)   | C8   | C10  | F12  | 111.71(16) |
| C20  | Fe   | C17  | 103.42(10) | C12  | C11  | N5   | 111.86(15) |
| C20  | Fe   | C18  | 96.36(9)   | C14  | C11  | N5   | 120.62(15) |
| C20  | Fe   | C19  | 105.31(11) | C14  | C11  | C12  | 127.52(16) |
| N2   | N1   | Ag   | 113.28(9)  | C13  | C12  | C11  | 103.61(14) |
| C1   | N1   | Ag   | 137.94(10) | C12  | C13  | N6   | 109.23(15) |
| C1   | N1   | N2   | 105.79(12) | C15  | C13  | N6   | 124.63(16) |
| C3   | N2   | N1   | 109.30(13) | C15  | C13  | C12  | 126.04(16) |
| B    | N2   | N1   | 121.60(12) | F14  | C14  | F13  | 105.95(17) |
| B    | N2   | C3   | 128.52(13) | F15  | C14  | F13  | 108.23(19) |
| N4   | N3   | Ag   | 115.58(9)  | F15  | C14  | F14  | 106.95(17) |
| C6   | N3   | Ag   | 136.53(11) | C11  | C14  | F13  | 112.46(16) |
| C6   | N3   | N4   | 105.79(12) | C11  | C14  | F14  | 112.40(16) |
| C8   | N4   | N3   | 109.42(13) | C11  | C14  | F15  | 110.55(17) |
| B    | N4   | N3   | 122.57(12) | F17  | C15  | F16  | 106.90(17) |
| B    | N4   | C8   | 128.00(13) | F18  | C15  | F16  | 107.37(17) |
| N6   | N5   | Ag   | 117.66(10) | F18  | C15  | F17  | 107.11(18) |
| C11  | N5   | Ag   | 133.85(11) | C13  | C15  | F16  | 108.89(17) |
| C11  | N5   | N6   | 106.08(13) | C13  | C15  | F17  | 114.07(16) |
| C13  | N6   | N5   | 109.23(13) | C13  | C15  | F18  | 112.16(16) |
| B    | N6   | N5   | 122.07(12) | Fe   | C16  | Ag   | 71.46(6)   |
| B    | N6   | C13  | 128.65(14) | O1   | C16  | Ag   | 114.12(14) |
| C2   | C1   | N1   | 112.37(14) | O1   | C16  | Fe   | 174.33(16) |
| C4   | C1   | N1   | 122.07(14) | Fe   | C17  | Ag   | 70.60(6)   |
| C4   | C1   | C2   | 125.52(14) | O2   | C17  | Ag   | 115.31(15) |



**Table S3.** Bond Angles for [HB(3,5-(CF<sub>3</sub>)<sub>2</sub>Pz)<sub>3</sub>]Ag-Fe(CO)<sub>5</sub> (**3**).

| Atom | Atom | Atom | Angle/°    | Atom | Atom | Atom | Angle/°    |
|------|------|------|------------|------|------|------|------------|
| C3   | C2   | C1   | 103.39(14) | O2   | C17  | Fe   | 173.44(17) |
| C2   | C3   | N2   | 109.15(15) | O3   | C18  | Fe   | 178.42(19) |
| C5   | C3   | N2   | 124.77(15) | O4   | C19  | Fe   | 175.3(2)   |
| C5   | C3   | C2   | 126.05(15) | O5   | C20  | Fe   | 176.56(18) |
| F2   | C4   | F1   | 107.54(14) | N4   | B    | N2   | 109.33(12) |
| F3   | C4   | F1   | 106.83(14) | N6   | B    | N2   | 111.12(12) |
| F3   | C4   | F2   | 105.89(13) | N6   | B    | N4   | 110.17(12) |
| C1   | C4   | F1   | 113.03(13) |      |      |      |            |

## Computational Details

Geometry optimizations of the complexes were performed without symmetry constraints using the Gaussian09<sup>7</sup> optimizer together with Turbomole 7.1<sup>8</sup> energies and gradients at the BP86<sup>9</sup>/def2-TZVPP<sup>10</sup> level of theory using the D3 dispersion correction suggested by Grimme et al.<sup>11</sup> and the resolution-of-identity (RI) approximation.<sup>12</sup> This level is denoted RI-BP86-D3/def2-TZVPP. Vibrational analysis was performed to ensure that the optimized geometry corresponds to an energy minimum. Natural charges were computed at the BP86-D3/def2-TZVPP with the help of the NBO6.0 program.<sup>13</sup>

The interaction  $\Delta E_{\text{int}}$  between the selected fragments is analyzed with the help of the Energy Decomposition Analysis (EDA) method.<sup>14</sup> Within this approach,  $\Delta E_{\text{int}}$  can be decomposed into the following physically meaningful terms:

$$\Delta E_{\text{int}} = \Delta E_{\text{elstat}} + \Delta E_{\text{Pauli}} + \Delta E_{\text{orb}} + \Delta E_{\text{disp}}$$

The term  $\Delta E_{\text{elstat}}$  corresponds to the classical electrostatic interaction between the unperturbed charge distributions of the deformed reactants and is usually attractive. The Pauli repulsion  $\Delta E_{\text{Pauli}}$  comprises the destabilizing interactions between occupied orbitals and is responsible for any steric repulsion. The orbital interaction  $\Delta E_{\text{orb}}$  accounts for electron-pair bonding, charge transfer (interaction between occupied orbitals on one moiety with unoccupied orbitals on the other, including HOMO–LUMO interactions), and polarization (empty-occupied orbital mixing on one fragment due to the presence of another fragment). Finally, the  $\Delta E_{\text{disp}}$  term takes into account the interactions which are due to dispersion forces. Moreover, the NOCV (Natural Orbital for Chemical Valence)<sup>15</sup> extension of the EDA method has been also used to further partition the  $\Delta E_{\text{orb}}$  term. The EDA-NOCV approach provides pairwise energy

contributions for each pair of interacting orbitals to the total bond energy.

The program package AMS 2020.101<sup>16</sup> was used for the EDA-NOCV calculations at the same BP86-D3 level, in conjunction with a triple- $\zeta$ -quality basis set using uncontracted Slater-type orbitals (STOs) augmented by two sets of polarization functions with a frozen-core approximation for the core electrons.<sup>17</sup> Auxiliary sets of s, p, d, f, and g STOs were used to fit the molecular densities and to represent the Coulomb and exchange potentials accurately in each SCF cycle.<sup>18</sup> Scalar relativistic effects were incorporated by applying the zeroth-order regular approximation (ZORA).<sup>19</sup> This level of theory is denoted ZORA-BP86-D3/TZ2P//RI-BP86-D3/def2-TZVPP.

Cartesian coordinates (in Å) and total energies (in a. u., ZPVE included) of all the stationary points described in the text (RI-BP86-D3/def2-TZVPP).

**3:** E= -4703.9690430

|    |              |              |              |
|----|--------------|--------------|--------------|
| Ag | -1.116260000 | -0.024930000 | 0.121808000  |
| Fe | -3.763334000 | 0.047514000  | -0.078575000 |
| F  | -1.824542000 | -2.837548000 | -1.616645000 |
| F  | -1.344789000 | -2.796733000 | -3.757542000 |
| F  | -0.500271000 | -4.352206000 | -2.478492000 |
| F  | 4.001843000  | -1.167383000 | -3.994622000 |
| F  | 3.737762000  | 0.644352000  | -2.786839000 |
| F  | 4.682685000  | -1.127783000 | -1.915785000 |
| F  | -1.761981000 | -0.308956000 | 3.324196000  |
| F  | -1.282332000 | -2.383147000 | 3.844845000  |
| F  | -0.531522000 | -0.750641000 | 5.085620000  |
| F  | 4.383503000  | -2.393007000 | 3.050355000  |
| F  | 4.780019000  | -0.513710000 | 2.003819000  |
| F  | 4.159500000  | -2.281190000 | 0.871715000  |
| F  | -1.803101000 | 3.015758000  | -1.832407000 |
| F  | -2.026587000 | 3.432836000  | 0.303754000  |
| F  | -1.118818000 | 4.932985000  | -1.010838000 |
| F  | 4.026440000  | 4.172097000  | 0.451404000  |
| F  | 4.579128000  | 2.324783000  | -0.581643000 |
| F  | 3.994123000  | 2.260504000  | 1.525614000  |
| O  | -2.772361000 | -2.461895000 | 1.196060000  |
| O  | -2.343820000 | 0.008025000  | -2.691335000 |
| O  | -4.810135000 | 2.610166000  | -1.113360000 |
| O  | -4.109776000 | 1.286809000  | 2.595091000  |
| O  | -6.206480000 | -1.452672000 | -0.765949000 |
| N  | 0.480072000  | -1.427316000 | -1.142554000 |
| N  | 1.703126000  | -0.844727000 | -1.198168000 |
| N  | 0.496963000  | -0.440904000 | 1.775970000  |
| N  | 1.771009000  | -0.553993000 | 1.322193000  |
| N  | 0.342227000  | 1.700195000  | -0.459410000 |
| N  | 1.649673000  | 1.495805000  | -0.179585000 |
| C  | 0.365728000  | -2.168853000 | -2.254416000 |
| C  | 1.513700000  | -2.069477000 | -3.055933000 |
| H  | 1.718960000  | -2.548229000 | -4.004358000 |
| C  | 2.341122000  | -1.214084000 | -2.347004000 |
| C  | -0.829145000 | -3.032341000 | -2.522644000 |
| C  | 3.697553000  | -0.715493000 | -2.751238000 |
| C  | 0.464841000  | -1.044883000 | 2.974064000  |
| C  | 1.719277000  | -1.573151000 | 3.309835000  |
| H  | 2.006765000  | -2.110206000 | 4.203949000  |
| C  | 2.521351000  | -1.241469000 | 2.229864000  |
| C  | -0.781455000 | -1.119731000 | 3.802216000  |
| C  | 3.967758000  | -1.597947000 | 2.031035000  |
| C  | 0.162871000  | 3.029077000  | -0.509829000 |
| C  | 1.359737000  | 3.710793000  | -0.256749000 |
| H  | 1.534627000  | 4.777841000  | -0.230450000 |
| C  | 2.283521000  | 2.696144000  | -0.048009000 |
| C  | -1.193960000 | 3.604428000  | -0.767631000 |
| C  | 3.729058000  | 2.852166000  | 0.330005000  |
| C  | -3.012460000 | -1.454612000 | 0.686042000  |
| C  | -2.731489000 | -0.008690000 | -1.600010000 |
| C  | -4.372529000 | 1.626759000  | -0.713683000 |
| C  | -3.949303000 | 0.780726000  | 1.575732000  |
| C  | -5.254222000 | -0.862653000 | -0.503357000 |
| B  | 2.221471000  | 0.053444000  | -0.039675000 |

|                            |              |              |              |
|----------------------------|--------------|--------------|--------------|
| H                          | 3.410999000  | 0.103474000  | -0.074264000 |
| <b>4: E= -4385.6002582</b> |              |              |              |
| Ag                         | -1.652026000 | -0.022699000 | 0.117063000  |
| Fe                         | -4.287754000 | 0.075494000  | -0.140310000 |
| F                          | -2.399529000 | -3.109439000 | -1.067848000 |
| F                          | -1.836530000 | -3.336273000 | -3.172190000 |
| F                          | -1.181186000 | -4.817510000 | -1.707752000 |
| F                          | -2.371858000 | 0.429368000  | 3.334162000  |
| F                          | -1.848985000 | -1.507719000 | 4.209218000  |
| F                          | -1.188537000 | 0.334795000  | 5.180494000  |
| F                          | -2.334970000 | 2.618867000  | -2.468261000 |
| F                          | -2.484265000 | 3.418498000  | -0.438487000 |
| F                          | -1.572468000 | 4.626920000  | -2.026125000 |
| O                          | -3.286793000 | -2.125399000 | 1.617815000  |
| O                          | -2.855181000 | -0.454003000 | -2.689900000 |
| O                          | -5.347599000 | 2.353476000  | -1.692453000 |
| O                          | -4.682728000 | 1.834465000  | 2.214496000  |
| O                          | -6.679326000 | -1.611514000 | -0.484038000 |
| N                          | -0.101757000 | -1.595071000 | -0.908941000 |
| N                          | 1.185187000  | -1.161134000 | -0.924330000 |
| N                          | -0.096315000 | -0.150794000 | 1.843471000  |
| N                          | 1.205374000  | -0.252615000 | 1.463571000  |
| N                          | -0.202409000 | 1.569142000  | -0.714998000 |
| N                          | 1.121858000  | 1.369531000  | -0.504493000 |
| C                          | -0.128848000 | -2.711287000 | -1.650329000 |
| C                          | 1.142883000  | -3.017451000 | -2.154999000 |
| H                          | 1.422454000  | -3.842549000 | -2.797987000 |
| C                          | 1.970160000  | -2.002229000 | -1.678872000 |
| C                          | -1.386707000 | -3.483736000 | -1.894535000 |
| C                          | -0.109017000 | -0.265735000 | 3.180386000  |
| C                          | 1.185043000  | -0.442946000 | 3.684165000  |
| H                          | 1.482977000  | -0.582622000 | 4.715462000  |
| C                          | 2.010615000  | -0.437426000 | 2.560387000  |
| C                          | -1.379796000 | -0.251934000 | 3.968288000  |
| C                          | -0.326923000 | 2.806580000  | -1.217213000 |
| C                          | 0.921981000  | 3.423272000  | -1.348613000 |
| H                          | 1.135641000  | 4.423882000  | -1.701339000 |
| C                          | 1.837512000  | 2.480833000  | -0.874428000 |
| C                          | -1.675177000 | 3.366288000  | -1.537387000 |
| C                          | -3.484902000 | -1.226906000 | 0.915322000  |
| C                          | -3.252499000 | -0.271301000 | -1.617363000 |
| C                          | -4.906126000 | 1.478966000  | -1.090837000 |
| C                          | -4.503726000 | 1.128440000  | 1.324100000  |
| C                          | -5.746802000 | -0.948097000 | -0.353383000 |
| B                          | 1.650844000  | -0.003385000 | -0.005499000 |
| H                          | 2.837547000  | 0.032780000  | -0.028913000 |
| C                          | 3.297733000  | 2.609895000  | -0.773288000 |
| C                          | 3.996207000  | 2.238881000  | 0.387841000  |
| C                          | 4.019917000  | 3.131192000  | -1.861252000 |
| C                          | 5.384154000  | 2.348708000  | 0.445532000  |
| C                          | 5.407929000  | 3.259381000  | -1.794160000 |
| C                          | 6.094960000  | 2.858146000  | -0.644609000 |
| H                          | 3.451168000  | 1.864148000  | 1.251833000  |
| H                          | 3.486061000  | 3.414549000  | -2.768774000 |
| H                          | 5.904916000  | 2.030371000  | 1.347984000  |
| H                          | 5.954692000  | 3.660603000  | -2.647662000 |
| H                          | 7.180693000  | 2.943051000  | -0.598928000 |
| C                          | 3.411744000  | -1.827796000 | -1.896154000 |
| C                          | 3.969740000  | -0.575789000 | -2.205787000 |

|   |             |              |              |
|---|-------------|--------------|--------------|
| C | 4.263919000 | -2.941737000 | -1.794620000 |
| C | 5.346259000 | -0.433602000 | -2.369130000 |
| C | 5.639942000 | -2.801428000 | -1.979167000 |
| C | 6.186522000 | -1.544627000 | -2.254957000 |
| H | 3.322316000 | 0.291775000  | -2.319225000 |
| H | 3.840904000 | -3.915427000 | -1.545805000 |
| H | 5.757429000 | 0.552399000  | -2.582219000 |
| H | 6.287715000 | -3.674042000 | -1.892475000 |
| H | 7.263221000 | -1.432319000 | -2.382433000 |
| C | 3.471316000 | -0.585597000 | 2.507598000  |
| C | 4.269348000 | 0.133441000  | 3.414942000  |
| C | 4.097918000 | -1.429435000 | 1.575148000  |
| C | 5.660132000 | 0.025534000  | 3.375389000  |
| C | 5.487421000 | -1.520653000 | 1.524334000  |
| C | 6.273257000 | -0.793475000 | 2.422650000  |
| H | 3.790899000 | 0.797511000  | 4.135378000  |
| H | 3.494837000 | -2.016878000 | 0.885464000  |
| H | 6.265813000 | 0.592833000  | 4.082314000  |
| H | 5.951015000 | -2.159727000 | 0.773697000  |
| H | 7.360149000 | -0.864817000 | 2.381006000  |

5: E= -3388.2282227

|    |              |              |              |
|----|--------------|--------------|--------------|
| Ag | -0.862677000 | -0.107736000 | 0.200033000  |
| Fe | -3.474665000 | 0.215331000  | -0.087166000 |
| O  | -1.965812000 | 0.184806000  | -2.662359000 |
| O  | -2.085363000 | 2.326922000  | 1.490650000  |
| O  | -4.817828000 | -0.210154000 | 2.511723000  |
| O  | -4.317905000 | -2.535506000 | -0.791607000 |
| O  | -5.410199000 | 2.081149000  | -1.286936000 |
| N  | 0.599486000  | 1.570903000  | -0.600506000 |
| N  | 1.836087000  | 1.367632000  | -0.050670000 |
| N  | 0.530858000  | -1.521321000 | -0.839369000 |
| N  | 1.807799000  | -1.028319000 | -0.890299000 |
| N  | 0.532281000  | -0.488527000 | 1.967801000  |
| N  | 1.854670000  | -0.597099000 | 1.602612000  |
| C  | 0.450081000  | 2.895465000  | -0.763389000 |
| C  | 1.605674000  | 3.560162000  | -0.308033000 |
| H  | 1.792173000  | 4.627338000  | -0.301094000 |
| C  | 2.465497000  | 2.559681000  | 0.148309000  |
| C  | 0.370494000  | -2.342981000 | -1.889678000 |
| C  | 1.562394000  | -2.382905000 | -2.636064000 |
| H  | 1.756499000  | -2.957085000 | -3.533858000 |
| C  | 2.450819000  | -1.526605000 | -1.982021000 |
| C  | 0.381322000  | -1.157035000 | 3.125942000  |
| C  | 1.619284000  | -1.690672000 | 3.518009000  |
| H  | 1.828232000  | -2.271458000 | 4.410200000  |
| C  | 2.533486000  | -1.332951000 | 2.529448000  |
| C  | -2.375911000 | 0.182722000  | -1.577862000 |
| C  | -2.372033000 | 1.398512000  | 0.848356000  |
| C  | -4.285149000 | -0.043652000 | 1.504290000  |
| C  | -3.978759000 | -1.465606000 | -0.525943000 |
| C  | -4.652031000 | 1.353051000  | -0.812842000 |
| B  | 2.333676000  | -0.074595000 | 0.218999000  |
| H  | 3.531177000  | -0.081441000 | 0.197522000  |
| C  | -0.917866000 | -3.090722000 | -2.080262000 |
| H  | -1.681061000 | -2.547788000 | -1.500993000 |
| C  | -0.814920000 | -4.508778000 | -1.488846000 |
| C  | -1.354329000 | -3.124646000 | -3.550373000 |
| H  | -1.439054000 | -2.111533000 | -3.963113000 |
| H  | -0.627673000 | -3.680184000 | -4.160695000 |

|   |              |              |              |
|---|--------------|--------------|--------------|
| H | -2.326614000 | -3.625931000 | -3.652179000 |
| H | -0.054210000 | -5.094878000 | -2.024244000 |
| H | -1.776168000 | -5.035220000 | -1.572881000 |
| H | -0.530443000 | -4.469718000 | -0.429292000 |
| C | 3.820174000  | -1.065763000 | -2.395044000 |
| H | 4.423343000  | -0.933486000 | -1.482606000 |
| C | 3.713241000  | 0.308348000  | -3.088442000 |
| C | 4.523385000  | -2.090099000 | -3.292800000 |
| H | 4.598021000  | -3.069639000 | -2.802186000 |
| H | 3.980476000  | -2.223368000 | -4.239590000 |
| H | 5.537601000  | -1.748344000 | -3.539393000 |
| H | 3.134552000  | 0.217751000  | -4.018600000 |
| H | 4.710628000  | 0.697551000  | -3.337248000 |
| H | 3.205722000  | 1.039400000  | -2.446094000 |
| C | 3.981503000  | -1.754301000 | 2.470566000  |
| H | 4.125485000  | -2.325688000 | 3.401742000  |
| C | 4.992225000  | -0.594430000 | 2.504013000  |
| C | 4.257977000  | -2.722034000 | 1.304176000  |
| H | 3.561318000  | -3.570220000 | 1.323966000  |
| H | 4.144375000  | -2.221443000 | 0.335509000  |
| H | 5.283319000  | -3.113047000 | 1.368426000  |
| H | 4.999494000  | -0.041892000 | 1.557158000  |
| H | 6.005869000  | -0.985349000 | 2.670773000  |
| H | 4.759546000  | 0.111155000  | 3.312751000  |
| C | -0.943182000 | -1.326857000 | 3.823752000  |
| H | -0.716557000 | -1.845340000 | 4.769073000  |
| C | -1.889056000 | -2.233319000 | 3.014697000  |
| C | -1.600878000 | 0.016490000  | 4.170401000  |
| H | -0.942771000 | 0.628293000  | 4.801084000  |
| H | -1.812434000 | 0.592426000  | 3.264399000  |
| H | -2.549023000 | -0.140378000 | 4.702856000  |
| H | -2.138866000 | -1.770829000 | 2.048618000  |
| H | -2.827927000 | -2.402426000 | 3.560159000  |
| H | -1.423639000 | -3.205426000 | 2.805940000  |
| C | -0.784410000 | 3.451386000  | -1.418441000 |
| H | -1.599681000 | 2.732528000  | -1.236767000 |
| C | -0.588542000 | 3.543109000  | -2.943066000 |
| C | -1.198575000 | 4.799888000  | -0.817344000 |
| H | -1.356142000 | 4.718785000  | 0.265767000  |
| H | -0.424866000 | 5.561139000  | -0.993419000 |
| H | -2.128330000 | 5.159447000  | -1.278903000 |
| H | 0.227857000  | 4.238932000  | -3.184127000 |
| H | -1.503779000 | 3.904835000  | -3.433332000 |
| H | -0.334737000 | 2.560431000  | -3.360758000 |
| C | 3.831628000  | 2.673077000  | 0.770518000  |
| H | 3.901124000  | 1.893763000  | 1.544752000  |
| C | 4.017770000  | 4.033906000  | 1.456489000  |
| C | 4.951133000  | 2.424499000  | -0.257148000 |
| H | 4.865372000  | 1.429231000  | -0.709140000 |
| H | 4.901324000  | 3.168051000  | -1.065068000 |
| H | 5.937763000  | 2.500824000  | 0.221668000  |
| H | 4.004929000  | 4.851516000  | 0.721416000  |
| H | 4.986091000  | 4.069817000  | 1.973911000  |
| H | 3.224321000  | 4.224630000  | 2.190709000  |

**3-Cu:** E= -6197.6803769

|    |             |              |              |
|----|-------------|--------------|--------------|
| Cu | 0.996033000 | -0.082768000 | 0.050452000  |
| Fe | 3.480240000 | 0.213600000  | -0.111023000 |
| F  | 1.840041000 | 3.405350000  | 1.212809000  |
| F  | 2.054820000 | 3.706403000  | -0.940299000 |

|   |              |              |              |
|---|--------------|--------------|--------------|
| F | 0.942940000  | 5.159758000  | 0.254292000  |
| F | -3.984357000 | 3.988070000  | -1.247672000 |
| F | -3.902198000 | 1.956440000  | -2.065129000 |
| F | -4.491613000 | 2.277341000  | 0.017836000  |
| F | 1.927870000  | -2.336518000 | 2.231096000  |
| F | 1.592659000  | -1.398096000 | 4.183932000  |
| F | 0.717800000  | -3.350127000 | 3.753709000  |
| F | -4.176627000 | -0.904360000 | 3.837605000  |
| F | -4.586652000 | -1.202360000 | 1.710048000  |
| F | -4.026046000 | 0.781721000  | 2.443360000  |
| F | 2.026826000  | -1.535997000 | -3.397595000 |
| F | 2.099307000  | -2.829474000 | -1.633505000 |
| F | 1.216290000  | -3.565526000 | -3.500744000 |
| F | -4.005479000 | -2.852114000 | -2.987744000 |
| F | -4.342608000 | -0.791927000 | -2.330593000 |
| F | -4.158228000 | -2.393281000 | -0.851202000 |
| O | 2.176994000  | 0.874179000  | 2.479639000  |
| O | 1.885697000  | 1.218747000  | -2.401706000 |
| O | 4.900696000  | -1.168795000 | -2.302732000 |
| O | 4.817307000  | -1.823939000 | 1.571060000  |
| O | 5.173351000  | 2.613536000  | 0.163794000  |
| N | -0.237575000 | 1.766717000  | 0.016956000  |
| N | -1.540547000 | 1.488551000  | -0.245366000 |
| N | -0.310081000 | -0.900544000 | 1.479365000  |
| N | -1.605250000 | -0.525006000 | 1.302895000  |
| N | -0.192207000 | -1.034503000 | -1.357169000 |
| N | -1.531791000 | -0.889218000 | -1.187211000 |
| C | -0.101358000 | 3.098740000  | -0.124626000 |
| C | -1.315126000 | 3.693090000  | -0.494096000 |
| H | -1.518727000 | 4.739546000  | -0.675588000 |
| C | -2.206610000 | 2.635524000  | -0.561367000 |
| C | 1.189452000  | 3.834061000  | 0.102639000  |
| C | -3.653992000 | 2.703423000  | -0.958227000 |
| C | -0.243659000 | -1.502505000 | 2.678364000  |
| C | -1.494526000 | -1.498932000 | 3.309648000  |
| H | -1.757971000 | -1.906500000 | 4.276492000  |
| C | -2.331214000 | -0.867075000 | 2.404223000  |
| C | 1.008838000  | -2.138458000 | 3.208360000  |
| C | -3.788335000 | -0.547722000 | 2.587038000  |
| C | -0.021735000 | -1.996155000 | -2.280794000 |
| C | -1.255368000 | -2.483562000 | -2.726870000 |
| H | -1.442879000 | -3.256671000 | -3.459260000 |
| C | -2.190434000 | -1.758864000 | -2.003981000 |
| C | 1.335766000  | -2.476876000 | -2.702501000 |
| C | -3.682535000 | -1.936027000 | -2.039083000 |
| C | 2.444209000  | 0.592664000  | 1.382492000  |
| C | 2.322491000  | 0.795394000  | -1.411652000 |
| C | 4.316059000  | -0.638513000 | -1.465516000 |
| C | 4.265546000  | -1.037635000 | 0.937249000  |
| C | 4.511476000  | 1.678456000  | 0.055172000  |
| B | -2.088192000 | 0.046321000  | -0.069147000 |
| H | -3.277275000 | 0.055018000  | -0.109833000 |

**3-Ru:** E= -3535.0776302

|    |              |              |              |
|----|--------------|--------------|--------------|
| Ag | -0.964971000 | 0.026440000  | 0.185423000  |
| Ru | -3.678231000 | 0.036468000  | -0.122848000 |
| F  | -1.700217000 | -2.543783000 | -2.073311000 |
| F  | -1.039608000 | -2.438221000 | -4.163329000 |
| F  | -0.308858000 | -4.034051000 | -2.861820000 |
| F  | 4.141825000  | -0.560424000 | -4.110628000 |



|   |              |              |              |
|---|--------------|--------------|--------------|
| F | 3.849242000  | 1.062361000  | -2.664611000 |
| F | 4.842252000  | -0.789717000 | -2.050707000 |
| F | -1.566344000 | -0.616899000 | 3.299417000  |
| F | -1.120491000 | -2.728687000 | 3.684880000  |
| F | -0.316191000 | -1.189277000 | 5.007901000  |
| F | 4.492900000  | -2.912567000 | 2.642524000  |
| F | 4.951781000  | -0.905254000 | 1.901792000  |
| F | 4.246682000  | -2.443590000 | 0.513761000  |
| F | -1.628047000 | 3.180690000  | -1.442986000 |
| F | -1.811781000 | 3.498887000  | 0.716080000  |
| F | -0.879799000 | 5.034917000  | -0.536361000 |
| F | 4.206347000  | 4.042011000  | 1.020286000  |
| F | 4.762605000  | 2.363626000  | -0.266290000 |
| F | 4.159233000  | 1.993788000  | 1.804174000  |
| O | -2.289917000 | -2.592048000 | 0.841868000  |
| O | -2.400710000 | 0.257290000  | -2.943686000 |
| O | -4.602471000 | 2.970694000  | -0.526140000 |
| O | -4.368201000 | 0.485993000  | 2.865122000  |
| O | -6.229919000 | -1.498107000 | -0.940077000 |
| N | 0.650559000  | -1.290859000 | -1.298704000 |
| N | 1.865792000  | -0.690067000 | -1.278090000 |
| N | 0.685026000  | -0.616397000 | 1.757116000  |
| N | 1.940610000  | -0.730121000 | 1.262900000  |
| N | 0.511285000  | 1.742796000  | -0.229366000 |
| N | 1.815040000  | 1.492341000  | 0.037111000  |
| C | 0.536978000  | -1.856194000 | -2.510872000 |
| C | 1.675058000  | -1.620236000 | -3.298632000 |
| H | 1.875013000  | -1.945700000 | -4.310979000 |
| C | 2.498122000  | -0.870619000 | -2.475038000 |
| C | -0.629961000 | -2.711769000 | -2.895960000 |
| C | 3.839314000  | -0.291016000 | -2.814526000 |
| C | 0.639294000  | -1.374521000 | 2.862668000  |
| C | 1.870509000  | -2.005652000 | 3.095229000  |
| H | 2.145937000  | -2.671917000 | 3.902037000  |
| C | 2.670737000  | -1.570124000 | 2.050832000  |
| C | -0.594080000 | -1.475498000 | 3.707781000  |
| C | 4.096423000  | -1.949282000 | 1.771433000  |
| C | 0.352555000  | 3.073589000  | -0.147525000 |
| C | 1.555643000  | 3.707332000  | 0.185711000  |
| H | 1.744613000  | 4.763314000  | 0.323553000  |
| C | 2.462503000  | 2.662586000  | 0.298217000  |
| C | -0.990741000 | 3.697682000  | -0.356874000 |
| C | 3.906210000  | 2.754748000  | 0.705930000  |
| C | -2.573115000 | -1.537257000 | 0.449425000  |
| C | -2.836723000 | 0.129389000  | -1.888053000 |
| C | -4.218624000 | 1.897690000  | -0.387738000 |
| C | -4.099695000 | 0.296779000  | 1.766075000  |
| C | -5.287277000 | -0.920124000 | -0.626272000 |
| B | 2.386594000  | 0.042803000  | -0.010295000 |
| H | 3.576274000  | 0.099296000  | -0.043987000 |

**3-Os:** E= -3530.8948548

|    |              |              |              |
|----|--------------|--------------|--------------|
| Ag | -0.727526000 | 0.016676000  | 0.213879000  |
| Os | -3.458795000 | 0.031354000  | -0.097774000 |
| F  | -1.445997000 | -2.503872000 | -2.145154000 |
| F  | -0.797155000 | -2.336810000 | -4.235081000 |
| F  | -0.026729000 | -3.945073000 | -2.972596000 |
| F  | 4.320763000  | -0.301666000 | -4.172346000 |
| F  | 4.033264000  | 1.230054000  | -2.628979000 |
| F  | 5.063636000  | -0.639389000 | -2.142455000 |

|   |              |              |              |
|---|--------------|--------------|--------------|
| F | -1.294810000 | -0.822892000 | 3.276426000  |
| F | -0.812371000 | -2.943241000 | 3.556326000  |
| F | -0.023578000 | -1.456215000 | 4.946876000  |
| F | 4.781004000  | -3.018911000 | 2.451089000  |
| F | 5.220337000  | -0.973707000 | 1.808872000  |
| F | 4.507278000  | -2.443581000 | 0.352194000  |
| F | -1.392681000 | 3.244483000  | -1.295012000 |
| F | -1.589519000 | 3.441382000  | 0.877556000  |
| F | -0.662675000 | 5.050863000  | -0.283134000 |
| F | 4.436769000  | 4.006866000  | 1.209016000  |
| F | 4.994874000  | 2.400957000  | -0.166414000 |
| F | 4.402257000  | 1.919893000  | 1.884137000  |
| O | -2.048840000 | -2.660385000 | 0.739336000  |
| O | -2.272190000 | 0.245105000  | -2.982069000 |
| O | -4.353898000 | 2.998857000  | -0.463972000 |
| O | -3.970051000 | 0.502466000  | 2.945560000  |
| O | -6.118314000 | -1.393886000 | -0.783000000 |
| N | 0.894908000  | -1.244090000 | -1.341965000 |
| N | 2.097335000  | -0.618455000 | -1.313840000 |
| N | 0.950537000  | -0.702687000 | 1.728175000  |
| N | 2.202509000  | -0.779838000 | 1.218302000  |
| N | 0.748723000  | 1.755957000  | -0.147589000 |
| N | 2.053754000  | 1.499838000  | 0.103716000  |
| C | 0.774088000  | -1.757711000 | -2.576357000 |
| C | 1.893412000  | -1.461720000 | -3.370813000 |
| H | 2.083570000  | -1.737514000 | -4.399593000 |
| C | 2.713708000  | -0.731724000 | -2.527134000 |
| C | -0.375546000 | -2.629245000 | -2.976041000 |
| C | 4.039039000  | -0.112321000 | -2.857429000 |
| C | 0.919410000  | -1.523900000 | 2.788359000  |
| C | 2.156380000  | -2.159235000 | 2.974218000  |
| H | 2.442529000  | -2.869415000 | 3.738701000  |
| C | 2.944487000  | -1.659461000 | 1.949708000  |
| C | -0.305426000 | -1.684181000 | 3.636059000  |
| C | 4.368926000  | -2.014625000 | 1.635132000  |
| C | 0.583002000  | 3.079984000  | 0.001598000  |
| C | 1.783549000  | 3.703021000  | 0.363999000  |
| H | 1.967477000  | 4.751796000  | 0.553781000  |
| C | 2.696178000  | 2.658794000  | 0.421798000  |
| C | -0.763968000 | 3.704818000  | -0.178742000 |
| C | 4.140713000  | 2.736536000  | 0.828444000  |
| C | -2.372625000 | -1.598905000 | 0.399702000  |
| C | -2.689165000 | 0.115738000  | -1.918658000 |
| C | -3.989945000 | 1.915790000  | -0.341510000 |
| C | -3.773272000 | 0.300905000  | 1.832541000  |
| C | -5.136635000 | -0.851661000 | -0.521463000 |
| B | 2.630251000  | 0.057509000  | -0.019415000 |
| H | 3.819369000  | 0.120915000  | -0.064152000 |

## References

1. H. V. R. Dias, Z. Wang and W. Jin, *Inorg. Chem.*, 1997, **36**, 6205-6215.
2. a) H. V. R. Dias and T. K. H. H. Goh, *Polyhedron*, 2004, **23**, 273-282; b) S. G. Ridlen, N. V. Kulkarni and H. V. R. Dias, *Polyhedron*, 2017, **125**, 68-73.
3. L. Krause, R. Herbst-Irmer, G. M. Sheldrick and D. Stalke, *J. Appl. Crystallogr.*, 2015, **48**, 3-10.
4. G. Sheldrick, *Acta Crystallogr. Sect. A: Found. Adv.*, 2015, **71**, 3-8.
5. G. Sheldrick, *Acta Crystallogr. Sect. C: Struct. Chem.*, 2015, **71**, 3-8.
6. O. V. Dolomanov, L. J. Bourhis, R. J. Gildea, J. A. K. Howard and H. Puschmann, *J. Appl. Crystallogr.*, 2009, **42**, 339-341.
7. M. J. T. Frisch, G. W.; Schlegel, H. B.; Scuseria, G. E.; Robb, M. A.; Cheeseman, J. R.; Scalmani, G.; Barone, V.; Mennucci, B.; Petersson, G. A.; Nakatsuji, H.; Caricato, M.; Li, X.; Hratchian, H. P.; Izmaylov, A. F.; Bloino, J.; Zheng, G.; Sonnenberg, J. L.; Hada, M.; Ehara, M.; Toyota, K.; Fukuda, R.; Hasegawa, J.; Ishida, M.; Nakajima, T.; Honda, Y.; Kitao, O.; Nakai, H.; Vreven, T.; Montgomery, Jr., J. A.; Peralta, J. E.; Ogliaro, F.; Bearpark, M.; Heyd, J. J.; Brothers, E.; Kudin, K. N.; Staroverov, V. N.; Kobayashi, R.; Normand, J.; Raghavachari, K.; Rendell, A.; Burant, J. C.; Iyengar, S. S.; Tomasi, J.; Cossi, M.; Rega, N.; Millam, N. J.; Klene, M.; Knox, J. E.; Cross, J. B.; Bakken, V.; Adamo, C.; Jaramillo, J.; Gomperts, R.; Stratmann, R. E.; Yazyev, O.; Austin, A. J.; Cammi, R.; Pomelli, C.; Ochterski, J. W.; Martin, R. L.; Morokuma, K.; Zakrzewski, V. G.; Voth, G. A.; Salvador, P.; Dannenberg, J. J.; Dapprich, S.; Daniels, A. D.; Farkas, Ö.; Foresman, J. B.; Ortiz, J. V.; Cioslowski, J.; Fox, D. J., Gaussian 09, Revision A.1 ed., Gaussian, Inc., Wallingford CT, 2009.
8. R. Ahlrichs, M. Bär, M. Häser, H. Horn and C. Kölmel, *Chem. Phys. Lett.* 1989, **162**, 165-169.
9. a) A. D. Becke, *Phys. Rev. A* 1988, **38**, 3098-3100; b) J. P. Perdew, *Phys. Rev. B* 1986, **33**, 8822-8824.
10. F. Weigend and R. Ahlrichs, *Phys. Chem. Chem. Phys.* 2005, **7**, 3297-3305.
11. S. Grimme, J. Antony, S. Ehrlich and H. Krieg, *J. Chem. Phys.* 2010, **132**, 154104-19.
12. K. Eichkorn, O. Treutler, H. Öhm, M. Häser and R. Ahlrichs, *Chem. Phys. Lett.* 1995, **242**, 652-660.
13. E. D. Glendening, C. R. Landis and F. Weinhold, *J. Comput. Chem.* 2013, **34**, 1429-1437.
14. For reviews on the EDA method, see: a) F. M. Bickelhaupt and E. J. Baerends, in *Reviews in Computational Chemistry*, (Eds. K. B. Lipkowitz, D. B. Boyd), Wiley-VCH: New York, 2000, Vol. 15, pp. 1-86; b) M. von Hopffgarten and G. Frenking, *WIREs Comput. Mol. Sci.* 2012, **2**, 43-62.
15. M. P. Mitoraj, A. Michalak and T. Ziegler, *J. Chem. Theory Comput.* 2009, **5**, 962-975.

16. a) G. te Velde, F. M. Bickelhaupt, E. J. Baerends, C. Fonseca Guerra, S. J. A. van Gisbergen, J. G. Snijders and T. Ziegler, *J. Comput. Chem.* 2001, **22**, 931-967; b) ADF2020, SCM, Theoretical Chemistry, Vrije Universiteit, Amsterdam, The Netherlands, <http://www.scm.com>.
17. J. G. Snijders, P. Vernooijs and E. J. Baerends, *At. Data Nucl. Data Tables* 1981, **26**, 483-574.
18. J. Krijn and E. J. Baerends, *Fit Functions in the HFS-Method*, Internal Report (in Dutch), Vrije Universiteit Amsterdam, The Netherlands, 1984.
19. a) E. van Lenthe, E. J. Baerends and J. G. Snijders, *J. Chem. Phys.* 1993, **99**, 4597-4610; b) E. van Lenthe, E. J. Baerends and J. G. Snijders, *J. Chem. Phys.* 1994, **101**, 9783-9792; c) E. van Lenthe, A. Ehlers, E. J. Baerends, *J. Chem. Phys.* 1999, **110**, 8943-8953.
